# Supplementary material for: Early gut microbiota signature of aGvHD in children given allogeneic hematopoietic cell transplantation for hematological disorders
Source: PubMed Central journal article supplement (PMC6404274; doi:10.1186/s12920-019-0494-7), 2019-03-07

## Additional figures

**Figure S1.** PCoA based on Bray-Curtis distances of genus-level abundance profiles of the samples sequenced in the present study using Illumina HiSeq (red) and those from the study of Biagi *et al.* (2015) sequenced by Roche 454 pyrosequencing (yellow). Samples are identified by filled circles. PCoA first and second principal components are plotted.

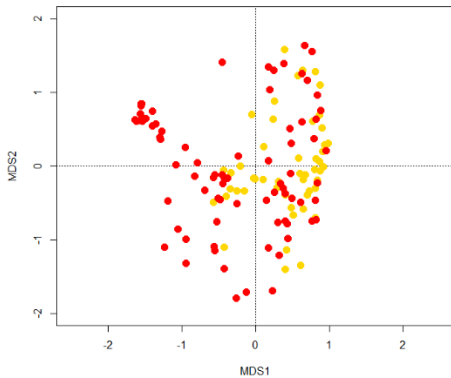

**Figure S2.** PCoA based on Bray-Curtis distances of genus-level abundance profiles of samples taken from patients aged <2 years (pink), 2-11 years (yellow) and >12 years (green), before HSCT (pre, A), 12-28 days after HSCT (engraftment, B) and >30 days after HSCT (post, C). Samples are identified by filled circles. PCoA first and second principal components are plotted.

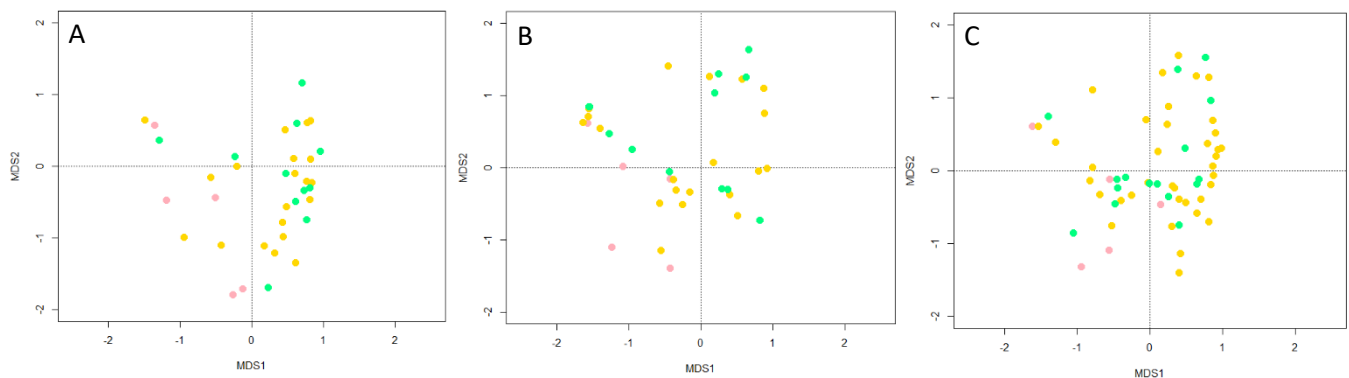

**Figure S3.** PCoA based on Bray-Curtis distances of genus-level abundance profiles of samples taken from patients hospitalized in the center of Bologna (light blue), Pavia (hotpink), Rome (gold), and Verona (green), before HSCT (pre, A), 12-28 days after HSCT (engraftment, B) and >30 days after HSCT (post, C). Samples are identified by filled circles. PCoA first and second principal components are plotted.

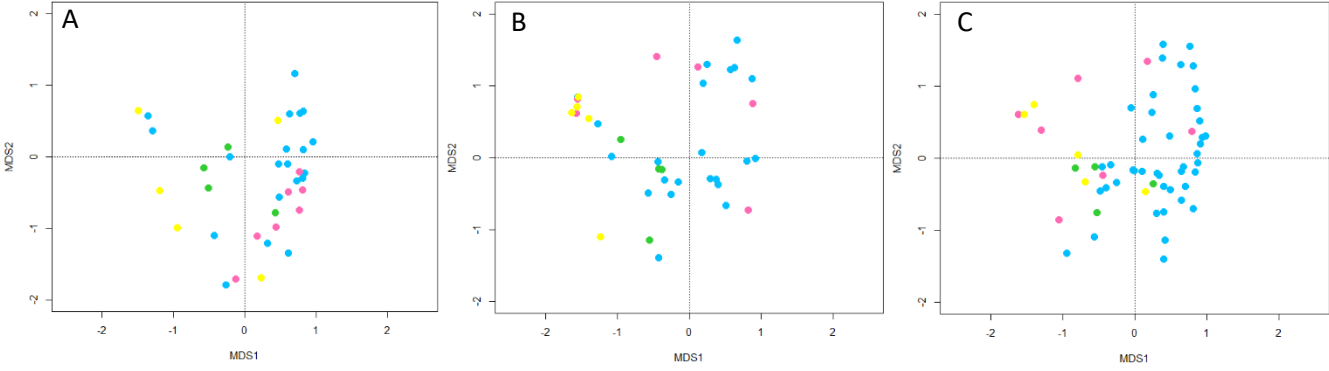

**Figure S4.** Box and whiskers distribution of the relative abundance (%) of OTUs assigned to the genera *Enterococcus* (A, D, G, L), *Citrobacter* (B, E, H, M) and *Erwinia* (C, F, I, N), in samples grouped as pre-transplantation (PRE, green), engraftment (ENG, orange) and post-transplantation (POST, blue), for the four enrollment centers of Bologna (A, B, C), Pavia (D, E, F), Verona (G, H, I) and Rome (L, M, N) hospitals.

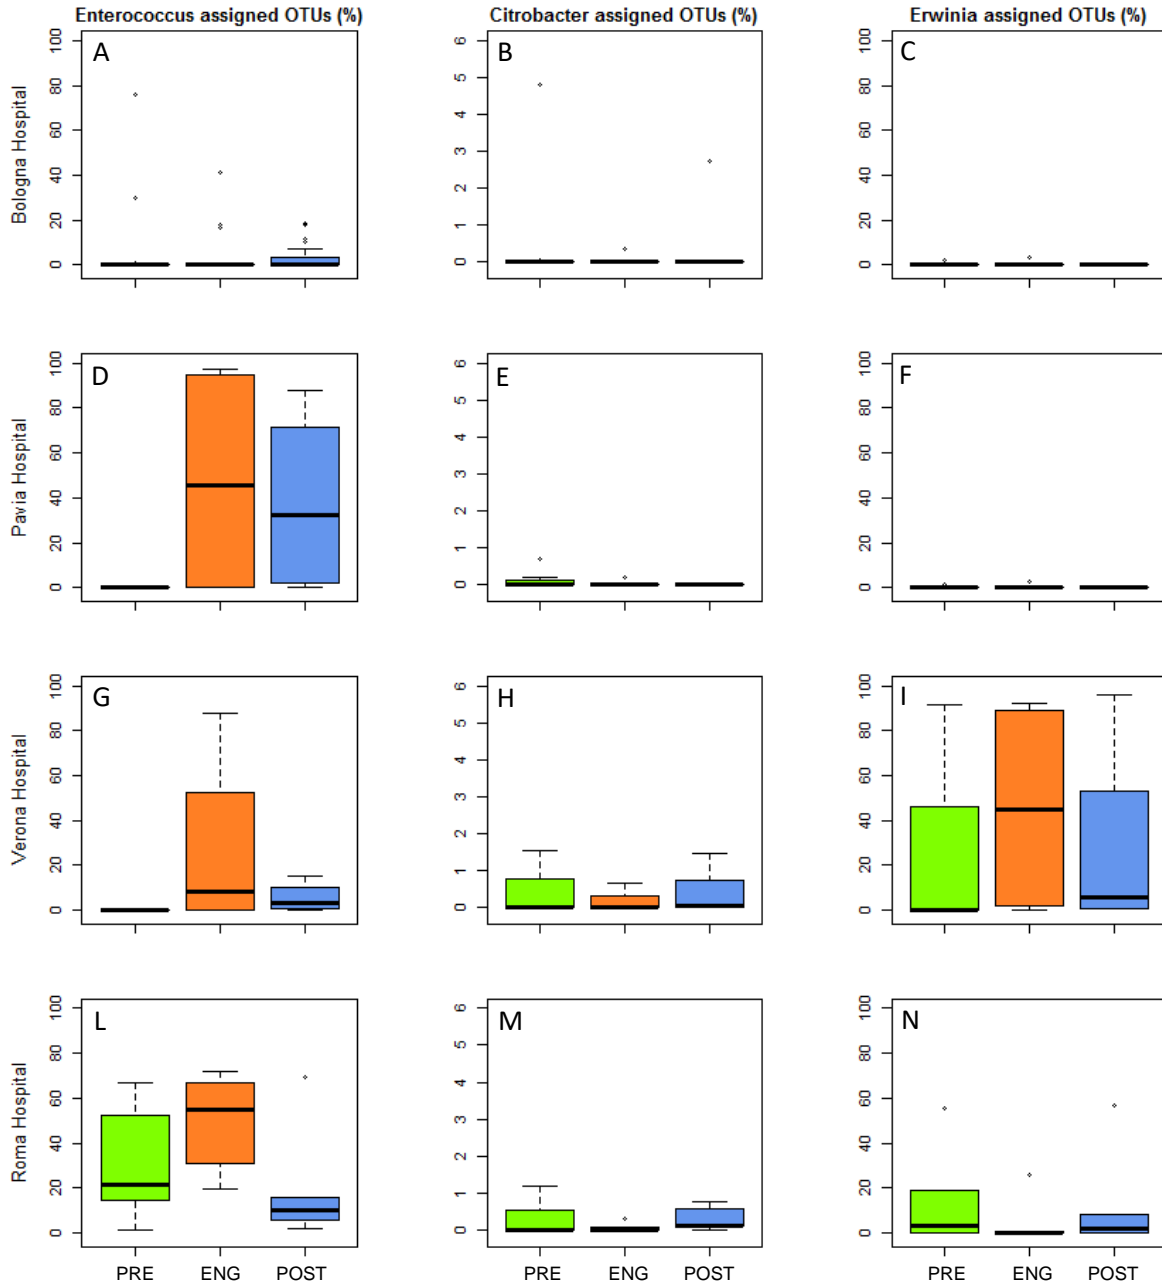

**Figure S5.** Box and whiskers distribution of the Simpson diversity index calculated for the genus-level microbiota profiles in samples taken before HSCT from subjects who did not develop aGvHD (green), who developed aGvHD (I-II grade) at a skin level (gold), and who developed gastrointestinal aGvHD (II-IV grade) (dark red).

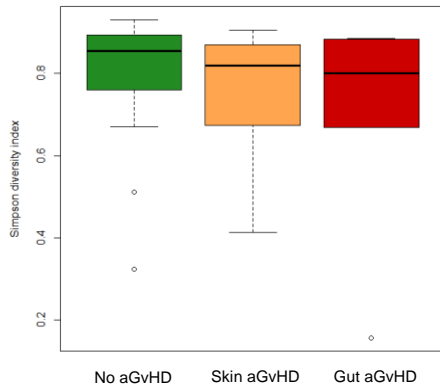

**Figure S6.** Box and whiskers distribution of the Bray-Curtis distances calculated using the genus-level gut microbiota profiles of samples taken before HSCT from subjects who did not develop aGvHD (green), who developed aGvHD (I-II grade) at a skin level (gold), and who developed gastrointestinal aGvHD (II-IV grade) (dark red).

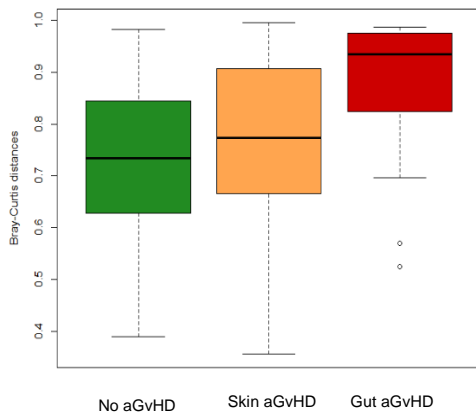

**Figure S7.** PCoA based on Bray-Curtis distances of genus-level abundance profiles of samples taken >30 days after HSCT from patients who did not develop aGvHD (green), who developed aGvHD (I-II grade) at a skin level (gold), and who developed gastrointestinal aGvHD (II-IV grade) (dark red). Samples are identified by filled circles. First and second principal components (MDS1 and MDS2) are plotted, accounting for 18.4 and 8.9% of variance in the dataset, respectively.

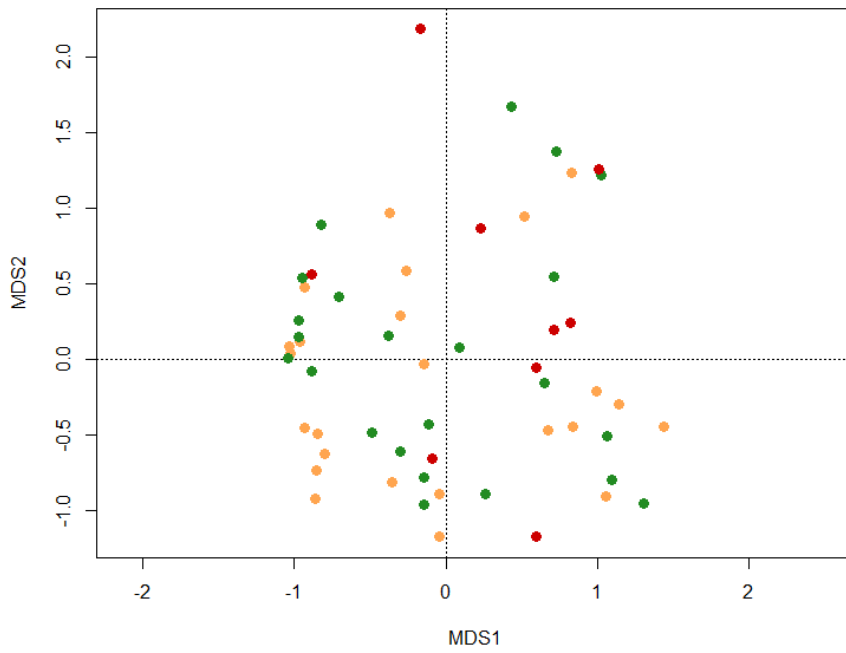

Supplement: 12920_2019_494_MOESM1_ESM.pdf [file 12920_2019_494_MOESM1_ESM.pdf]
